# Supplementary material for: Surface modification of biomass-derived hard carbon by grafting porous carbon nanosheets for high-performance supercapacitors
Source: Royal Society of Chemistry journal article supplement (doi:10.1039/c8ta04080j), 2018-01-01
Supplement: c8ta04080j1.pdf [file c8ta04080j1.pdf]

## **Electronic Supplementary Information**

**Surface modification of rice husk-derived hard carbon by grafting porous carbon  
nanosheets for high-performance supercapacitors**

*Shian Dong,<sup>a</sup> Xiaojun He,<sup>\*a</sup> Hanfang Zhang,<sup>a</sup> Xiaoyu Xie,<sup>a</sup> Moxin Yu,<sup>a</sup> Chang Yu,<sup>b</sup> Nan  
Xiao<sup>b</sup> and Jieshan Qiu<sup>\*b</sup>*

## Contents

### 1. Experimental Section

### 2. Supplementary Figures and Tables

**Fig. S1** FESEM and TEM images of MgO particles.

**Fig. S2** FESEM images of intermediate product of PCNS/RHC<sub>8</sub> at 500 °C: (a, b) Unwashed samples; (c, d) Samples washed by acid and distilled water.

**Fig. S3** TEM images of PCNS/RHC<sub>8</sub>.

**Fig. S4** (a) N<sub>2</sub> adsorption-desorption isotherms of PCNS<sub>950</sub>, RHC<sub>950</sub> and PCNS/RHC<sub>8</sub>; (b) Pore size distribution of PCNS<sub>950</sub>, RHC<sub>950</sub> and PCNS/RHC<sub>8</sub>; (c) Cumulative surface area of PCNS/RHC<sub>8</sub> and RHC<sub>950</sub>; (d) Cumulative pore volume of PCNS/RHC<sub>8</sub> and RHC<sub>950</sub>.

**Fig. S5** FT-IR spectra of PCNS/RHC composites.

**Fig. S6** (a) CV curves of PCNS/RHCs at 5 mV s<sup>-1</sup>; (b) CV curves of PCNS/RHCs at 100 mV s<sup>-1</sup>.

**Fig. S7** (a) CV curves of RHC<sub>950</sub> at different scan rates; (b) Specific capacitances of RHC<sub>950</sub> at different current densities; (c) Nyquist plot of RHC<sub>950</sub>; (d) Bode plot of RHC<sub>950</sub> electrodes.

**Fig. S8** The equivalent circuit of Randle's model.

**Table S1** The Zeta potential of raw materials.

**Table S2** The contents of C, O, N elements and oxygen-containing functional groups in PCNS/RHCs.

**Table S3** Fitted equivalent circuit elements of PCNS/RHC<sub>8</sub> and RHC<sub>950</sub>.

## 1. Experimental Section

*Synthesis of PCNS/RHCs:* Rice husks were obtained from the suburb of Maanshan City in China. The coal tar pitch (CTP) with a softening point of 110 °C was provided by Maanshan Iron & Steel Co. Ltd. of China. Other chemicals were purchased from Aladdin, and used as received. For a typical run, rice husks were put into a box furnace and heated to 500 °C for 1 h in Ar atmosphere. The product was washed by 0.5 M NaOH solution and distilled water to remove silicon dioxide. The rice husk-derived carbon (RHC) was obtained after the above mentioned product was dried at 110 °C. Subsequently, the mixtures of RHC (1.0 g), CTP (1.0 g), nano-MgO (8.0 g) and KOH (X g) were ground and transferred to a corundum boat, which was put into a tube furnace and heated to 300 °C at 5 °C min<sup>-1</sup> for 1 h, then heated to 950 °C for 1 h. The products were washed with 2 M HCl solution and distilled water to remove the inorganic impurities, and dried at 110 °C for 24 h before use. The obtained materials are named as PCNS/RHC<sub>x</sub>, where X refers to the mass of KOH. For comparison, the mixtures with RHC (2.0 g), nano-MgO (8.0 g) and KOH (8.0 g) without the presence of CTP were also heated to 950 °C for 1 h in Ar atmosphere, and the product was washed by 2 M HCl solution and distilled water to remove the inorganic impurities and dried at 110 °C for 24 h. The obtained material is denoted as RHC<sub>950</sub>. Additionally, the mixtures with CTP (2.0 g), nano-MgO (8.0 g) and KOH (8.0 g) without the presence of RHC were also heated to 950 °C for 1 h in Ar atmosphere, and the product was washed by 2 M HCl solution and distilled water to remove the

inorganic impurities and dried at 110 °C for 24 h. The obtained material is denoted as PCNS<sub>950</sub>.

*Characterization:* The Zeta potentials of MgO, CTP and RHC were tested in the deionized water by Nano-ZS90, Malvern. The microstructures of PCNS/RHCs were analyzed by field emission scanning electron microscopy (FESEM, Hitachi, S4800), transmission electron microscopy (TEM, JEOL-2100). The crystallographic structures of PCNS/RHCs were examined by X-ray diffraction (XRD, Philips X, CuK $\alpha$  Radiation,  $\lambda=0.15406$  nm). Raman spectroscopy analysis was performed with JYLab-RamHR800, excited by a 532 nm laser, and X-ray photoelectron spectroscopy (XPS) was obtained by Thermo ESCALAB250, USA. Fourier transform infrared (FT-IR) spectra were recorded with Thermo-Scientific Nicolet 6700 spectrophotometer. The conductivity of PCNS/RHC<sub>8</sub> was measured by a four-wire method using a source measure unit (Keithley 6430). The pore structure of the sample was studied by nitrogen adsorption-desorption technique at -196 °C in an adsorption apparatus (Micrometrics, ASAP2010). The  $S_{\text{BET}}$  was calculated at a relative pressure from 0.05 to 0.20.

*Electrochemical measurements:* Active material (PCNS/RHCs) and polytetrafluoroethylene with the mass ratio of 90:10 were mixed together by adding some deionized water and a few drops of ethanol, followed by evaporation of solvent. Then the mixture was rolled into carbon sheet, which was dried at 110 °C under vacuum in drying oven for 2 h and punched into round films with diameter of 12 mm and mass loading of *ca.* 2 mg cm<sup>-2</sup>. The as-prepared round films were used as

electrodes after being pressed on nickel foam for the electrochemical measurement in 6 M KOH electrolyte.

The electrochemical measurements were carried out in two-electrode system on an electrochemical workstation (CHI760C, Shanghai, China). The charge-discharge performance of supercapacitors was measured on a supercapacitance test system (SCTs, Arbin Instruments, USA). The electrochemical impedance spectroscopy (EIS) measurement was performed with an amplitude of 5 mV over a frequency range from 100 kHz to 0.001 Hz using a Solartron impedance analyzer (Solartron Analytical, SI 1260, UK) with a Solartron potentiostat (SI 1287).

The gravimetric specific capacitance of the electrodes,  $C$  ( $\text{F g}^{-1}$ ), is calculated according to galvanostatic charge-discharge (GCD) curve based on Eq. (1).

$$C = \frac{4I}{m \frac{\Delta V}{\Delta t}} \quad (1)$$

where  $I$  is the discharge current (A),  $\Delta V/\Delta t$  is the average slope of the discharge curve after the voltage drop ( $\text{V s}^{-1}$ ), and  $m$  is the total mass of active materials in two electrodes (g).

The energy density ( $E$ ,  $\text{Wh kg}^{-1}$ ) and power density ( $P$ ,  $\text{W kg}^{-1}$ ) based on the total mass of active materials in supercapacitors, are calculated according to Eqs. (2) and (3).

$$E = \frac{1}{2 \times 4 \times 3.6} CV^2 \quad (2)$$

$$P = \frac{E}{\Delta t} \quad (3)$$

where  $V$  is the usable voltage after voltage drop (V) and  $\Delta t$  is the discharge time (s).

## 2. Supplementary Figures and Tables

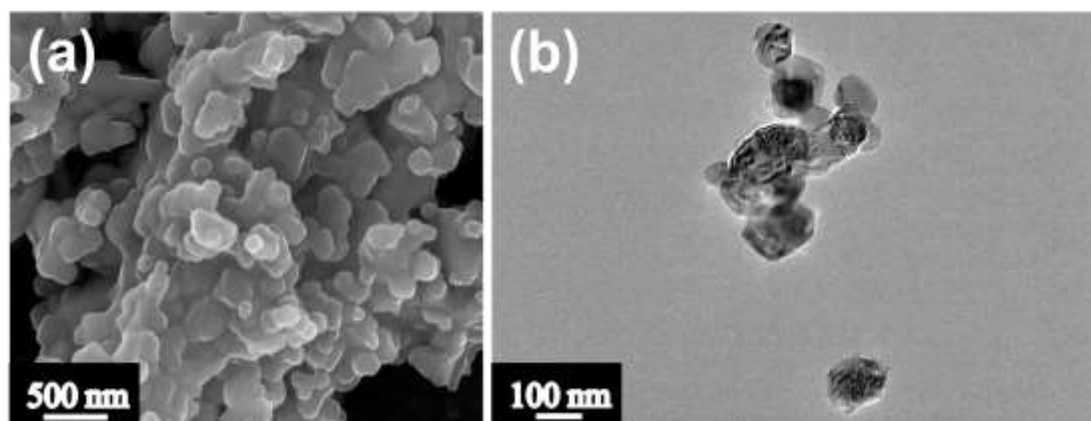

**Fig. S1** FESEM and TEM images of MgO particles.



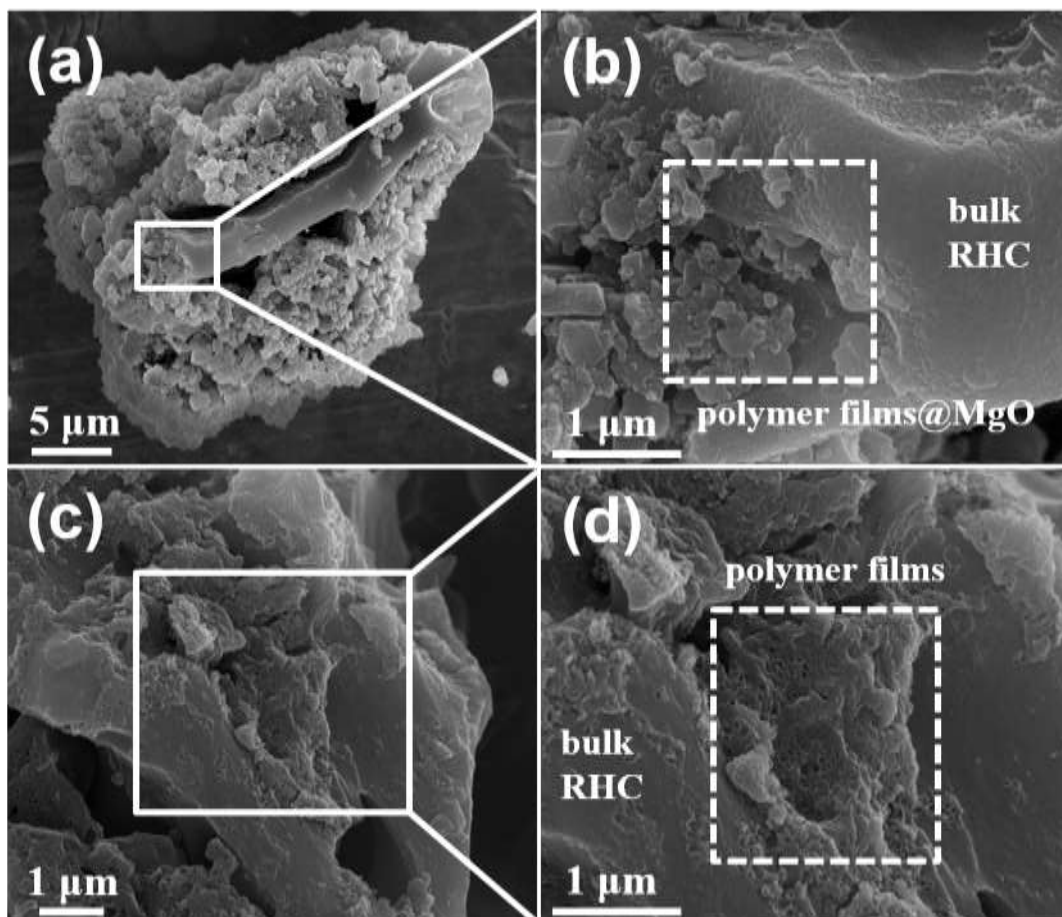

**Fig. S2** FESEM images of intermediate product of PCNS/RHC<sub>8</sub> at 500 °C: (a, b) Unwashed samples; (c, d) Samples washed by acid and distilled water.

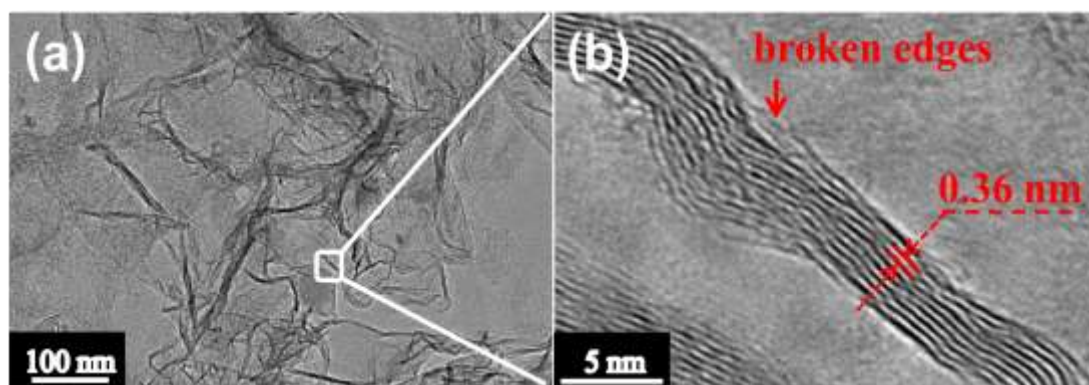

**Fig. S3** TEM images of PCNS/RHC<sub>8</sub>.

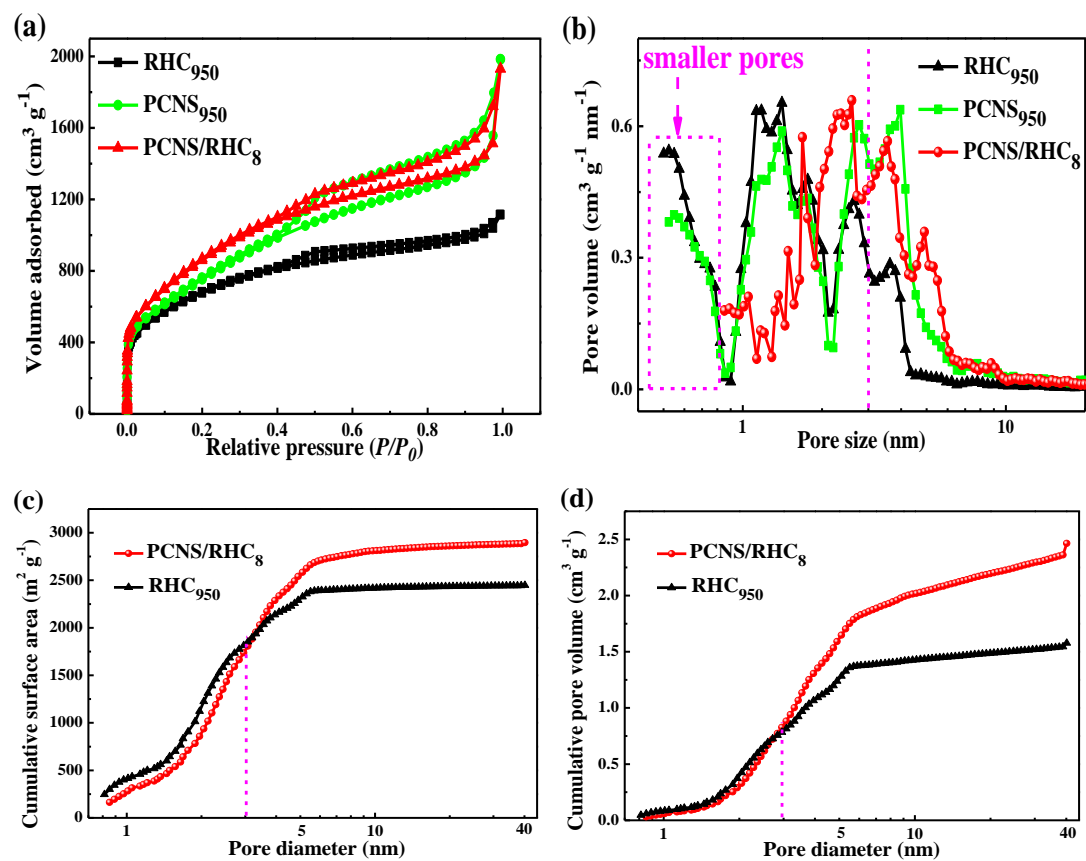

**Fig. S4** (a)  $N_2$  adsorption-desorption isotherms of PCNS<sub>950</sub>, RHC<sub>950</sub> and PCNS/RHC<sub>8</sub>; (b) Pore size distribution of PCNS<sub>950</sub>, RHC<sub>950</sub> and PCNS/RHC<sub>8</sub>; (c) Cumulative surface area of PCNS/RHC<sub>8</sub> and RHC<sub>950</sub>; (d) Cumulative pore volume of PCNS/RHC<sub>8</sub> and RHC<sub>950</sub>.

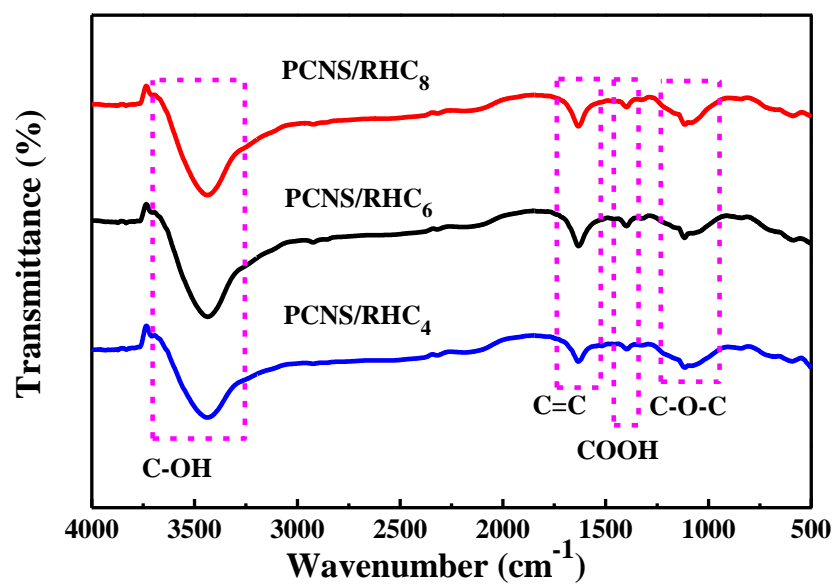

**Fig. S5** FT-IR spectra of PCNS/RHC composites.

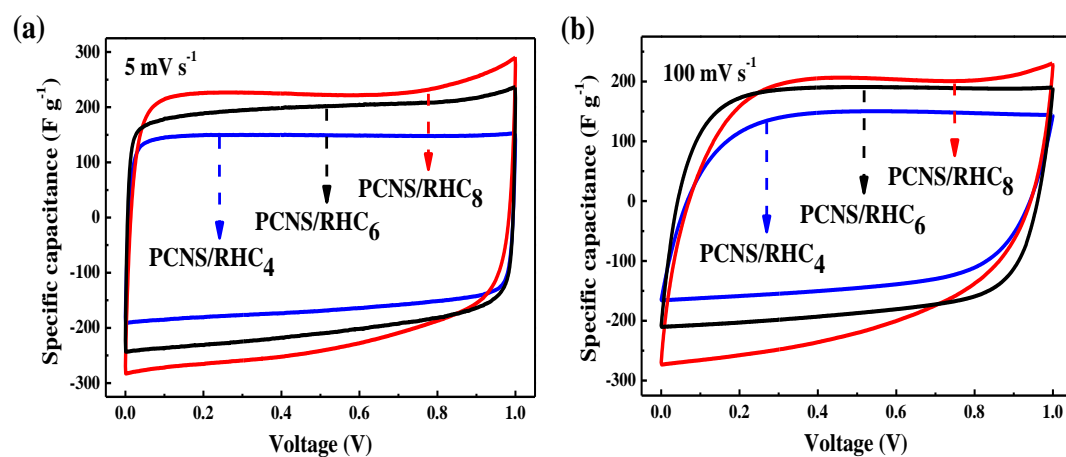

**Fig. S6** (a) CV curves of PCNS/RHCs at 5 mV s<sup>-1</sup>; (b) CV curves of PCNS/RHCs at 100 mV s<sup>-1</sup>.

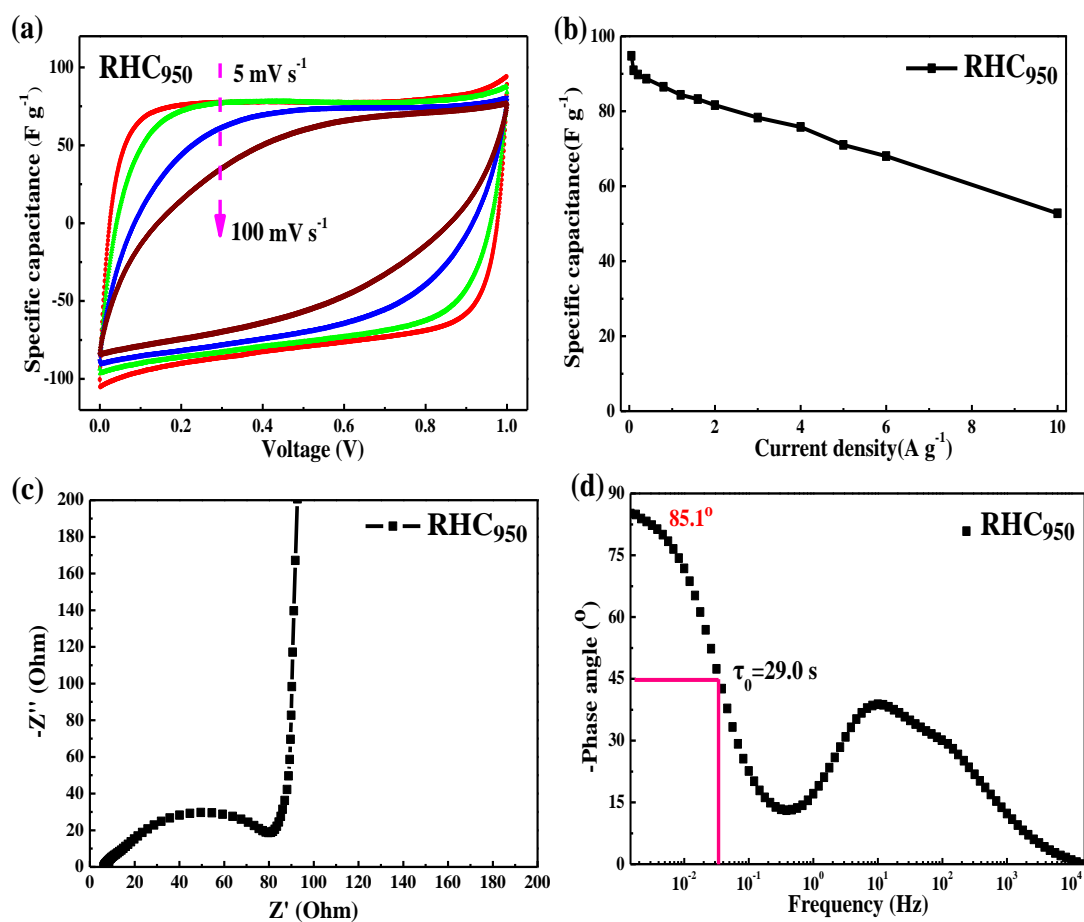

**Fig. S7** (a) CV curves of RHC<sub>950</sub> at different scan rates; (b) Specific capacitances of RHC<sub>950</sub> at different current densities; (c) Nyquist plot of RHC<sub>950</sub>; (d) Bode plot of RHC<sub>950</sub> electrodes.

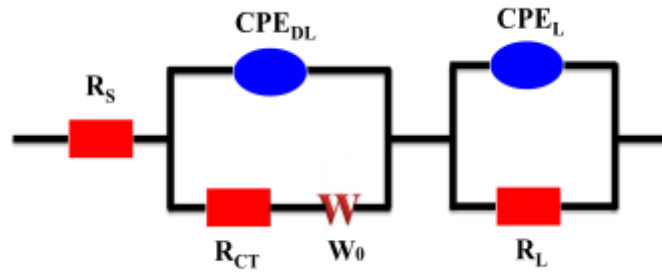

**Fig. S8** The equivalent circuit of Randle's model.

$R_s$ : equivalent series resistance.  $CPE_{DL}$ : double layer capacitance.  $CPE_L$ : pseudocapacitance.  $R_{CT}$ : charge transfer resistance.  $W_0$ : Warburg element.  $R_L$ : leakage resistance.

**Table S1** The Zeta potential of raw materials.

| Samples | Zeta potential (mV) |
|---------|---------------------|
| RHC     | −21.2               |
| CTP     | −28.8               |
| MgO     | 21.5                |



**Table S2** The contents of C, O, N elements and oxygen-containing functional groups in PCNS/RHCs.

| Samples               | C1s (%) | O1s (%) | N1s (%) | O1s     |         |         |
|-----------------------|---------|---------|---------|---------|---------|---------|
|                       |         |         |         | C=O (%) | C–O (%) | O–H (%) |
| PCNS/RHC <sub>4</sub> | 95.06   | 3.32    | 1.62    | 1.36    | 0.86    | 1.10    |
| PCNS/RHC <sub>6</sub> | 91.93   | 6.70    | 1.37    | 2.21    | 2.08    | 2.41    |
| PCNS/RHC <sub>8</sub> | 88.28   | 10.71   | 1.01    | 2.37    | 5.16    | 3.18    |

**Table S3** Fitted equivalent circuit elements of PCNS/RHC<sub>8</sub> and RHC<sub>950</sub>.

| Samples               | $R_S$<br>(Ohm) | $R_{CT}$<br>(Ohm) | $CPE_{DL}$  |      | $W$<br>( $S s^{0.5}$ ) | $CPE_L$     |      |
|-----------------------|----------------|-------------------|-------------|------|------------------------|-------------|------|
|                       |                |                   | $Q (S s^n)$ | $n$  |                        | $Q (S s^n)$ | $n$  |
| PCNS/RHC <sub>8</sub> | 0.43           | 0.62              | 0.32        | 0.96 | $1.5 \cdot 10^{-16}$   | 0.0006      | 0.85 |
| RHC <sub>950</sub>    | 6.20           | 87.13             | 0.0054      | 1    | $3.8 \cdot 10^{-4}$    | 0.0016      | 0.68 |
